# Supplementary material for: Hawthorn fruit extract ameliorates H2O2-induced oxidative damage in neuronal PC12 cells and prolongs the lifespan of Caenorhabditis elegans via the IIS signaling pathway
Source: Royal Society of Chemistry journal article supplement (doi:10.1039/d2fo01657e), 2022-01-01
Supplement: d2fo01657e1.pdf [file d2fo01657e1.pdf]

## 1 Supplement information

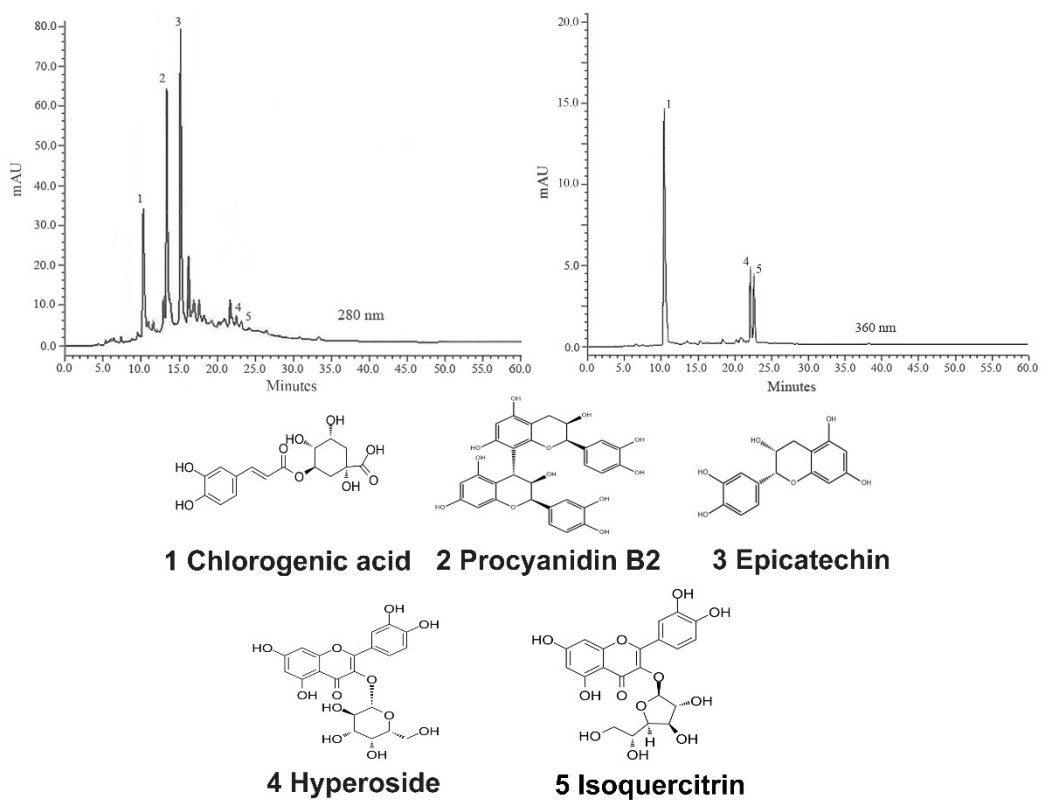

2

3 **Fig. S1** High performance liquid chromatography profile of phenolic compounds in

4 HFE.

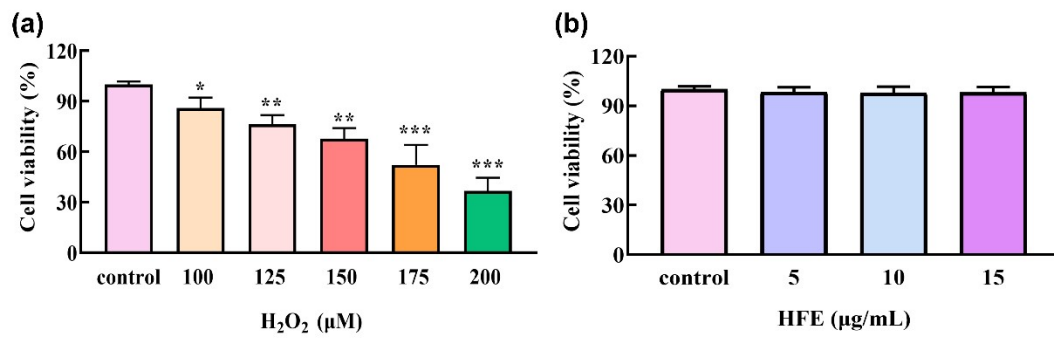

5

6 **Fig. S2** Effects of H<sub>2</sub>O<sub>2</sub> and HFE on PC12 Cell viability. (a) Effect of different  
7 concentrations of H<sub>2</sub>O<sub>2</sub> on cell viability. (b) HFE had uninjurious effect on nerve cells.

8

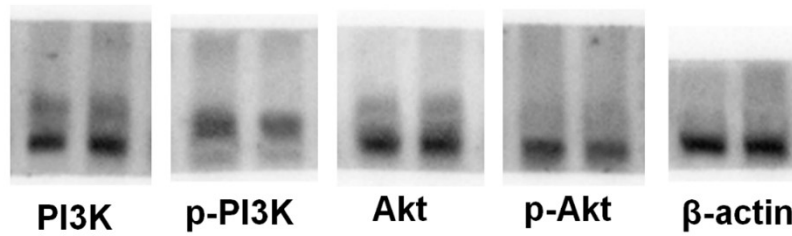

9

10 **Fig. S3** The western blot images of PI3K, p-PI3K, Akt, p-Akt and β-actin in *C.*  
11 *elegans* with or without 100 μg/mL HFE treatment.

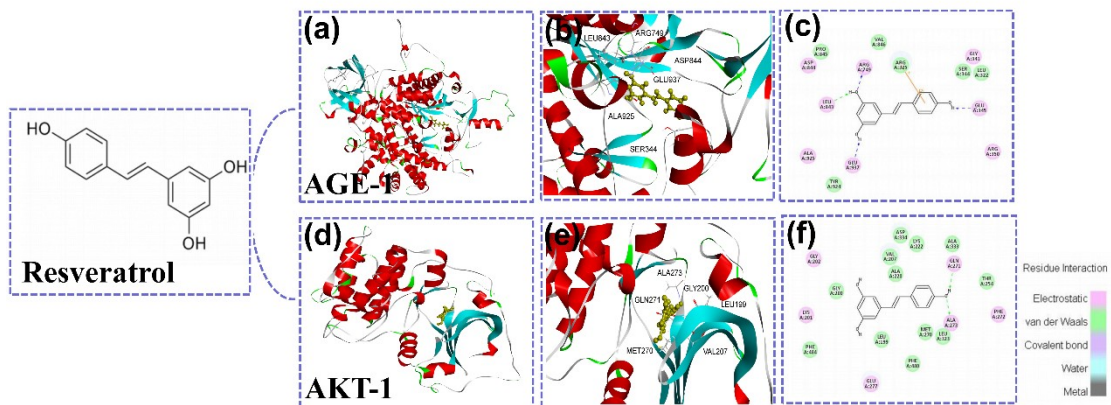

12

13 **Fig. S4** The molecular docking results of resveratrol and AGE-1, AKT-1, respectively.

14 (a), (b) and (d), (e) showed that resveratrol interacted with AGE-1 and AKT-1,

15 respectively. The maximum interaction between resveratrol and AGE-1, AKT-1 was

16 represented by two-dimensional docking picture (c), (f), respectively.

17 **Table S1** Primers used for Real-time PCR.

| <b>Gene</b> | <b>Accession No.</b> | <b>Primer sequences</b>                                         |
|-------------|----------------------|-----------------------------------------------------------------|
| DAF-2       | NM_065249.7          | 5'-TCGGACGCTATTCATATTACG-3'<br>3'-GGCTTATCGGCTACAATCG-5'        |
| AGE-1       | NM_064061.6          | 5'-ATTGTGCTCTCCGAACTC-3'<br>3'-GCTGCTCATTCAACTTCTC-5'           |
| AKT-1       | NM_001028475.5       | 5'-AGTCAGCTAAAGCATGGGAGA-3'<br>3'-TCTTTGATTTGACGTTCACTGG-5'     |
| DAF-16      | NM_001381205.1       | 5'-TCAAGCCAATGCCACTACC-3'<br>3'-TGGAAGAGCCGATGAAGAAG-5'         |
| SOD-3       | NM_078363.9          | 5'-GGCTAAGGATGGTGGAGAAC-3'<br>3'-ACAGGTGGCGATCTTCAAG-5'         |
| CTL-1       | NM_064578.6          | 5'-GCGTATCTTCTCCTACAC-3'<br>3'-ACTCCTTCACATCATCAC-5'            |
| CTL-2       | NM_001027302.8       | 5'-TACAGTCGGTGGTGAGAG-3'<br>3'-GGTGAGTCTGTGGATTACG-5'           |
| MTL-1       | NM_072295.6          | 5'-TGGAGACAAGTGTTGTGAGAAG-3'<br>3'-TTAATGAGCCGCAGCAGTTC-5'      |
| CAT-1       | NM_001029766.2       | 5'-CTCCTCGGATTCTCTATCGGTATG-3'<br>3'-AAGGCGGCATCGGCAATG-5'      |
| GST-4       | NM_069447.8          | 5'-CTCTTGCTGAGCCAATCCGTATC-3'<br>3'-TGACTGACCGAATTGTTCTCCATC-5' |
| SKN-1       | NM_171345.6          | 5'-CACTGTCTCCTCTCATCATTGG-3'<br>3'-GAGTGTCTCTGTGAGTGATATGG-5'   |
| HSF-1       | NM_060630.7          | 5'-CATCATCTTCGGCTCCATCTG-3'<br>3'-AATAGTCTTGTTGCGGCTGAG-5'      |
| HSP-16.1    | NM_072953.5          | 5'-CACTTTACCACTATTTCCGTCCAG-3'<br>3'-GGCTTGAAGTGCAGACATTG-5'    |
| HSP-16.2    | NM_001392482.1       | 5'-CTCAACGTTCCGTTTTGGT-3'<br>3'-CGTTGAGATTGATGGCAAAC-5'         |
| ACT-1       | NM_073418.9          | 5'-GGAATTGCTGATCGTATGC-3'<br>3'-CTGTTGGAAGGTGGAGAG-5'           |

19 **Table S2** Effect of HEF on lifespan of N2 worms.

| Genotype | Dose (µg/mL) | Mean lifespan (days) | Maximum lifespan (days) | % Change in mean lifespan | <i>P</i> -value |
|----------|--------------|----------------------|-------------------------|---------------------------|-----------------|
| N2       | 0            | 14.34±0.05           | 19.97±0.36              | -                         | -               |
|          | 25           | 15.87±0.29           | 20.02±0.22              | 11.44                     | n.s.            |
|          | 50           | 16.89±0.29*          | 21.84±0.26*             | 19.06                     | < 0.05          |
|          | 100          | 18.14±0.17**         | 25.17±0.19**            | 28.43                     | < 0.01          |
|          | 200          | 12.75±0.14           | 19.39±0.54              | -4.49                     | n.s.            |
|          | 500          | 11.38±0.14*          | 17.69±0.70*             | -14.71                    | < 0.05          |
| N2       | 0            | 14.64±0.52           | 19.83±0.33              | -                         | -               |
|          | 25           | 15.95±0.94           | 20.14±0.19              | 8.95                      | n.s.            |
|          | 50           | 17.16±0.98*          | 21.97±0.23*             | 17.21                     | < 0.05          |
|          | 100          | 18.12±0.76**         | 25.05±0.18**            | 23.77                     | < 0.01          |

20 n.s.: no significance.

22 **Table S3** Effect of HEF on longevity of N2 worms exposed to various stresses.

| Stress condition              | Dose (µg/mL) | Mean lifespan | Maximum lifespan | Unit | % Change in Mean lifespan | P-value |
|-------------------------------|--------------|---------------|------------------|------|---------------------------|---------|
| H <sub>2</sub> O <sub>2</sub> | 0            | 1.42±0.08     | 3.05±0.07        | Hour | -                         | -       |
|                               | 25           | 1.73±0.05*    | 3.45±0.18*       |      | 21.83                     | < 0.05  |
|                               | 50           | 1.81±0.09*    | 3.61±0.25*       |      | 27.46                     | < 0.05  |
|                               | 100          | 2.08±0.02**   | 3.95±0.36**      |      | 46.48                     | < 0.01  |
| Juglone                       | 0            | 4.04±0.03     | 8.23±0.08        | Hour | -                         | -       |
|                               | 25           | 4.76±0.12     | 9.15±0.16        |      | 17.82                     | n.s.    |
|                               | 50           | 5.44±0.06*    | 9.31±0.34*       |      | 34.65                     | < 0.05  |
| Paraquat                      | 100          | 6.21±0.13**   | 10.6±0.53**      | Day  | 53.71                     | < 0.01  |
|                               | 0            | 3.83±0.02     | 6.03±0.08        |      | -                         | -       |
|                               | 25           | 4.02±0.07     | 6.16±0.25        |      | 4.96                      | n.s.    |
| Heat shock                    | 50           | 4.39±0.11*    | 7.02±0.36*       | Hour | 14.62                     | < 0.05  |
|                               | 100          | 5.14±0.13*    | 7.28±0.19*       |      | 34.20                     | < 0.05  |
|                               | 0            | 10.03±0.14    | 12.06±0.06       |      | -                         | -       |
| Ultraviolet                   | 25           | 11.08±0.11    | 13.11±0.19       | Hour | 10.47                     | n.s.    |
|                               | 50           | 11.89±0.45*   | 13.89±0.62*      |      | 18.54                     | < 0.05  |
|                               | 100          | 12.21±0.76*   | 15.12±0.37*      |      | 21.73                     | < 0.05  |
| Ultraviolet                   | 0            | 2.96±0.09     | 4.51±0.01        | Hour | -                         | -       |
|                               | 25           | 3.19±0.23     | 4.73±0.26        |      | 7.60                      | n.s.    |
|                               | 50           | 3.60±0.31*    | 5.37±0.15*       |      | 21.62                     | < 0.05  |
|                               | 100          | 3.97±0.26*    | 5.58±0.64*       |      | 33.95                     | < 0.05  |

23 n.s.: no significance.

25 **Table S4** Effect of HEF on lifespan of N2 worms and mutants.

| Genotype             | Dose<br>( $\mu\text{g/mL}$ ) | Mean<br>lifespan<br>(days) | Maximum<br>lifespan<br>(days) | % Change in<br>Mean<br>lifespan | <i>P</i> -value |
|----------------------|------------------------------|----------------------------|-------------------------------|---------------------------------|-----------------|
| <i>daf-2(e1370)</i>  | 0                            | 31.45 $\pm$ 0.32           | 46.30 $\pm$ 0.34              | -                               | -               |
|                      | 100                          | 31.15 $\pm$ 0.41           | 45.70 $\pm$ 0.13              | -0.95                           | n.s.            |
| <i>age-1(hx546)</i>  | 0                            | 22.39 $\pm$ 0.11           | 39.37 $\pm$ 0.32              | -                               | -               |
|                      | 100                          | 22.54 $\pm$ 0.26           | 39.74 $\pm$ 0.65              | 0.01                            | n.s.            |
| <i>akt-1(ok525)</i>  | 0                            | 25.40 $\pm$ 0.03           | 35.93 $\pm$ 0.31              | -                               | -               |
|                      | 100                          | 25.30 $\pm$ 0.20           | 36.01 $\pm$ 0.55              | -0.02                           | n.s.            |
| <i>daf-16(mu86)</i>  | 0                            | 15.72 $\pm$ 0.51           | 22.78 $\pm$ 0.38              | -                               | -               |
|                      | 100                          | 15.74 $\pm$ 0.21           | 22.68 $\pm$ 0.56              | 0.12                            | n.s.            |
| <i>skn-1(zu67)</i>   | 0                            | 17.53 $\pm$ 0.19           | 24.41 $\pm$ 0.34              | -                               | -               |
|                      | 100                          | 17.31 $\pm$ 0.13           | 24.48 $\pm$ 0.13              | 1.25                            | n.s.            |
| <i>hsf-1(sy441)</i>  | 0                            | 17.47 $\pm$ 0.27           | 24.93 $\pm$ 0.35              | -                               | -               |
|                      | 100                          | 17.62 $\pm$ 0.34           | 25.50 $\pm$ 0.98              | 0.86                            | n.s.            |
| <i>eat-2(ad1116)</i> | 0                            | 27.21 $\pm$ 0.86           | 42.44 $\pm$ 0.22              | -                               | -               |
|                      | 100                          | 31.00 $\pm$ 0.61*          | 45.78 $\pm$ 0.67*             | 13.93                           | < 0.05          |
| N2                   | 0                            | 14.64 $\pm$ 0.52           | 19.83 $\pm$ 0.33              | -                               | -               |
|                      | 100                          | 18.12 $\pm$ 0.76**         | 25.05 $\pm$ 0.18**            | 23.77                           | < 0.01          |

26 n.s.: no significance.

28 **Table S5** Molecular docking between resveratrol, procyanidin B2, epicatechin,  
 29 chlorogenic acid, and hyperoside with receptor proteins.

| <b>Ligand name</b> | <b>Receptor name</b> | <b>Interactive residues</b>                                                                                                                                                                                         | <b>Hydrogen bonds involved residues</b>                             | <b>Binding energy (kJ/mol)</b> | <b>Electrostatic energy (kJ/mol)</b> |
|--------------------|----------------------|---------------------------------------------------------------------------------------------------------------------------------------------------------------------------------------------------------------------|---------------------------------------------------------------------|--------------------------------|--------------------------------------|
| Resveratrol        | AGE-1                | VAL 846,<br>ARG 325,<br>SER 344,<br>GLY 341,<br>LEU 322,<br>GLU 345,<br>ARG 350,<br>GLU 937,<br>TYR 924,<br>ALA 925,<br>LEU 843,<br>ASP 844,<br>PRO 845,<br>ARG 749                                                 | LEU 843,<br>ARG 749,<br>ASP 844,<br>GLU 937,<br>ALA 925,<br>SER 344 | -65.1628                       | -6.10753                             |
|                    | AKT-1                | ALA 220,<br>VAL 207,<br>ASP 334,<br>LYS 222,<br>ALA 333,<br>GLN 271,<br>THR 254,<br>PHE 272,<br>ALA 372,<br>LEU 323,<br>MET 270,<br>PHE 480,<br>LEU 199,<br>GLU 277,<br>PHE 484,<br>LYS 201,<br>GLY 200,<br>GLY 202 | ALA 273,<br>GLY 200,<br>GLN 271,<br>LEU 199,<br>VAL 207,<br>MET 270 | -78.297                        | -9.33945                             |
| Procyanidin B2     | AGE-1                | LEU 717,<br>GLU 906,<br>ASP 909,                                                                                                                                                                                    | VAL 846,<br>ARG 325,<br>ASP 340,                                    | -114.854                       | -1.49271                             |



|             |       |                                                                                                                                                                                             |                                                                     |          |          |
|-------------|-------|---------------------------------------------------------------------------------------------------------------------------------------------------------------------------------------------|---------------------------------------------------------------------|----------|----------|
|             |       | LYS 913,<br>LEU 921,<br>PRO 923,<br>ASN 922,<br>SER 344,<br>LYS 1044,<br>SER 348,<br>GLU 347,<br>ARG 749,<br>ASP 340,<br>VAL 846,<br>ASP 844,<br>ARG 753,<br>LEU 843,<br>ARG753,<br>HIS 716 | GLU 347,<br>ASN 922,<br>PRO 923                                     |          |          |
|             |       | THR 354,<br>VAL 207,<br>GLY 200,<br>LYS 318,<br>GLU 320,<br>ASP 334,<br>LEU 323,<br>LYS 222,<br>ASN 321,<br>PHE 204,<br>GLU 277,<br>THR 203,<br>GLY 202,<br>PHE 279,<br>LYS 201             | GLU 320,<br>GLY 202,<br>THR 203,<br>PHE 204,<br>ASP 334,<br>ASN 321 | -82.9911 | -9.81912 |
| Epicatechin | AGE-1 | GLU 906,<br>ALA 925,<br>ARG 749,<br>ASP 844,<br>VAL 846,<br>PRO 845,<br>THR 327,<br>ARG 325,<br>LEU 322,<br>GLY 341,<br>ARG 350,                                                            | VAL 846,<br>THR 327,<br>LEU 322,<br>ASP 844,<br>GLY 341,<br>GLU 345 | -96.6125 | -4.95113 |

---

---

|                     |       |                                                                                                                                                                                                                                             |                                                                     |                        |
|---------------------|-------|---------------------------------------------------------------------------------------------------------------------------------------------------------------------------------------------------------------------------------------------|---------------------------------------------------------------------|------------------------|
|                     |       | GLU 345,<br>SER 344,<br>LEU 843                                                                                                                                                                                                             |                                                                     |                        |
|                     |       | ASP 334,<br>LYS 318,<br>ASN 321,<br>GLU 320,<br>PHE 484,<br>LYS 201,<br>GLU 277,<br>GLY 200,<br>LEU 323,<br>ALA 273,<br>ALA 220,<br>PHE 272,<br>GLN 271,<br>LYS 222,<br>MET 270,<br>THR 254,<br>ALA 333,<br>PHE 480,<br>LEU 199,<br>VAL 207 | GLN 271,<br>ALA 273,<br>PHE 272,<br>LYS 222,<br>GLN 271,<br>ASN 321 | -62.5309      -8.62561 |
|                     | AKT-1 |                                                                                                                                                                                                                                             |                                                                     |                        |
|                     |       | ASP 844,<br>ARG 749,<br>ALA 925,<br>ARG 753,<br>LEU 843,<br>TYR 924,<br>PRO 923,<br>GLU 906,<br>ARG 350,<br>LEU 322,<br>GLU 345,<br>GLY 341,<br>ARG 325,<br>SER 344                                                                         | LEU 843,<br>ALA 925,<br>GLU 345,<br>TYR 924,<br>PRO 923,<br>ARG 350 | -51.967      -74.663   |
|                     | AGE-1 |                                                                                                                                                                                                                                             |                                                                     |                        |
| Chlorogenic<br>acid |       | VAL 207,<br>LEU 199,<br>ALA 333,<br>LYS 206,                                                                                                                                                                                                | ALA 273,<br>THR 254,<br>GLN 271,<br>GLY 202,                        | -61.1878      -49.9943 |
|                     | AKT-1 |                                                                                                                                                                                                                                             |                                                                     |                        |

---

---

|            |                                                                                                                                                                                                                     |                                                                      |          |          |
|------------|---------------------------------------------------------------------------------------------------------------------------------------------------------------------------------------------------------------------|----------------------------------------------------------------------|----------|----------|
|            | GLY 202,<br>GLY 200,<br>LEU 224,<br>LYS 222,<br>PHE 204,<br>GLY 205,<br>THR 203,<br>ASP 334,<br>LYS 201,<br>PHE 480,<br>GLU 277,<br>THR 254,<br>PHE 272,<br>ALA 273,<br>ALA 220,<br>GLN 271,<br>MET 270,<br>LEU 323 | LYS 222,<br>ASP 334                                                  |          |          |
|            | ARG 749,<br>HIS 716,<br>LYS 913,<br>SER 344,<br>SER 348,<br>ARG 1012,<br>LYS 1044,<br>GLU 345,<br>ARG 350,<br>LEU 322,<br>ARG 325,<br>ASP 844                                                                       | ASP 844,<br>LEU 322,<br>GLU 345,<br>LYS 1044,<br>SER 344,<br>ARG 350 |          |          |
| AGE-1      |                                                                                                                                                                                                                     |                                                                      | -200.675 | -48.1313 |
| Hyperoside | ASP 334,<br>GLU 320,<br>LEU 323,<br>GLY 200,<br>LEU 199,<br>PHE 480,<br>GLU 277,<br>PHE 484,<br>VAL 207,<br>LYS 318,<br>LYS 201,<br>GLY 202,                                                                        | GLU 277,<br>PHE 480,<br>GLY 202,<br>VAL 207,<br>ASP 334,<br>LYS 318, |          |          |
| AKT-1      |                                                                                                                                                                                                                     |                                                                      | -97.2875 | -7.71958 |

---

---

GLY 205,  
PHE 204,  
LEU 224,  
LYS 222,  
GLY 336

---
